# Supplementary material for: Formononetin, a Beer Polyphenol with Catabolic Effects on Chondrocytes
Source: MDPI journal article supplement (doi:10.3390/nu15132959), 2023-06-29
Supplement: s1 [file s1]

**Table S1.** Gibbs free energy (kcal/mol) values from docking analysis for the nine strongest interactions receptor/ligand.

| Receptor | ER $\alpha$ |     | ER $\beta$ |     | AhR     |            |     |
|----------|-------------|-----|------------|-----|---------|------------|-----|
| Rank     | Estradiol   | FNT | Estradiol  | FNT | Agonist | Antagonist | FNT |
| 1        | 6.3         | 6.8 | 7.0        | 6.5 | 6.5     | 8.0        | 7.7 |
| 2        | 6.0         | 6.6 | 7.0        | 6.2 | 6.5     | 7.9        | 7.5 |
| 3        | 5.9         | 6.5 | 7.0        | 6.2 | 6.4     | 7.7        | 6.7 |
| 4        | 5.8         | 6.4 | 7.0        | 5.8 | 6.4     | 7.5        | 6.7 |
| 5        | 5.8         | 6.4 | 6.9        | 5.8 | 6.1     | 7.5        | 6.6 |
| 6        | 5.6         | 6.4 | 6.6        | 5.8 | 6.1     | 7.2        | 6.6 |
| 7        | 5.5         | 6.2 | 6.5        | 5.7 | 6.0     | 7.1        | 6.5 |
| 8        | 5.5         | 6.1 | 6.5        | 5.6 | 6.0     | 6.9        | 6.5 |
| 9        | 5.5         | 6.1 | 6.4        | 5.6 | 5.9     | 6.3        | 6.3 |
